# Supplementary material for: PARP inhibitor olaparib induces DNA damage and acts as a drug sensitizer in an in vitro model of canine hematopoietic cancer
Source: BMC Vet Res. 2025 Jul 5;21:439. doi: 10.1186/s12917-025-04880-z (PMC12228278; doi:10.1186/s12917-025-04880-z)
Supplement: Supplementary file 1 — Supplementary Material 1 [file 12917_2025_4880_MOESM1_ESM.xlsx]

## Sheet: Foglio1
Supplementary Table 1. Complete list of variants identified in DNA-damage response genes of CLBL1 and GL1 cell lines. The variants predicted pathogenic/adverse by VEP and/or Fido-SNP are in red color. The variants shared by CLBL1 and GL1 cell lines are reported on a grey background.
BRCA2
CELL LINE	cDNA position	location in CanFam6	CDS position	Protein position	Exon	Tipe of mutation	Consequences VEP	Consequences Fido-SNP	Homozygous/Heterozygous
GL1	636	25 7817006 rs23250374 T C	c.428A>G	p.His143Arg	5	SNP missense	Tolerated	Pathogenic	HE
	1366	25 7807391 rs850935038 A C	c.1158T>G	p.Cys386Trp	10	SNP missense	Tolerated	Benign	HE
	4512	25 7803097 rs8676219 T C	c.4304A>G	p.Lys1435Arg	11	SNP missense	Tolerated	Benign	HE
	6894	25 7800715 rs3345369832 C A	c.6686G>T	p.Cys2229Phe	11	SNP missense	Tolerated	Benign	HE
	7138	25 7798631 rs23255542 G A	c.6930C>T	p.Phe2310=	12	SNP synonimous	/	Benign	HE
	10203-1204	25 7765371 C CTTT	c.9995_9996insAAA	p.Met3332delinsIleLys	27	inframe insertion			HE
CLBL1	636	25 7817006 rs23250374 T C	c.428A>G	p.His143Arg	5	SNP missense	Tolerated	Pathogenic	HE
	1366	25 7807391 rs850935038 A C	c.1158T>G	p.Cys386Trp	10	SNP missense	Tolerated	Benign	HO
	2609	25 7805000 rs23244160 T G	c.2401A>C	p.Lys801Gln	11	SNP missense	Deleterious	Benign	HE
	4512	25 7803097 rs8676219 T C	c.4304A>G	p.Lys1435Arg	11	SNP missense	Tolerated	Benign	HE
	7124-7126	25 7798642 ACAA A	c.6916_6918del	p.Leu2306del	12	Inframe deletion	/	/	HE
	7138	25 7798631 rs23255542	c.6930C>T	p.Phe2310=	12	SNP synonimous	/	Benign	HE
	10203-10204	25 7765371 C CTTT	c.9995_9996insAAA	p.Met3332delinsIleLys	27	inframe insertion	/	/	HO
BRCA1
CELL LINE	cDNA position	location in CanFam6	CDS position	Protein position	Exon	Tipe of mutation	Consequences VEP	Consequences Fido-SNP	Homozygous/Heterozygous
GL1	672	9 19446054 rs852697989 A G	c.604A>G	p.Lys202Glu	9	SNP missense	Tolerated	Benign	HE
	783	9 19446773 rs851598157 G A	c.715G>A	p.Gly239Ser	10	SNP missense	Tolerated	Benign	HE
	1397	9 19447387 rs852069537 A C	c.1329A>C	p.Arg443Ser	10	SNP missense	Deleterious	Pathogenic	HE
	3687	9 19449677 rs851839261 A G	c.3619A>G	p.Thr1207Ala	10	SNP missense	Tolerated	Benign	HE
	4022	9 19450012 rs397509570 A G	c.3954G>A	p.Ser1318=	10	SNP synonimous	/	Benign	HE
	5254	9 19473617 rs851864324 G A	c.5186G>A	p.Arg1729Lys	13	SNP missense	Tolerated	Benign	HE
	6641	9 19487019 rs3333784543 C A	c.*936C>A	/	23	3' UTR variant	3' UTR variant	Benign	HE
	6644	9 19487022 rs3332810602 A G	c.*939A>G	/	23	3'UTR variant	3' UTR variant	Benign	HE
TP53
CELL LINE	cDNA position	location in CanFam6	CDS position	Protein position	Exon	Tipe of mutation	Consequences VEP	Consequences Fido-SNP	Homozygous/Heterozygous
GL1	899	5 32702350 rs852661628 G A	c.709C>T	p.Arg237Trp	7	SNP missense	deleterious	Benign	HO
CLBL1	564	5 32702988 G A	c.374C>T	p.Ala125Val	5	SNP missense	deleterious	Pathogenic	HE
	954	5 32702034 C T	c.764G>A	p.Arg255His	8	SNP missense	tolerated (0.09)	Pathogenic	HE
RAD51
CELL LINE	cDNA position	location in CanFam6	CDS position	Protein position	Exon	Tipe of mutation	Consequences VEP	Consequences FidoSNP	Homozygous/Heterozygous
GL1	80	30 7896367 rs851405640 C T	c.-195C>T	/	1	5' UTR variant	/	Benign	HE
	1009	30 7929995 rs23648993 A G	c.735A>G	p.Leu245=	8	SNP synonimous	/	Pathogenic	HE
	1415	30 7931047 rs23645970 C A	c.*121C>A	/	10	3'UTR variant	/		HE
	1417	30 7931049 rs23645972 G A	c.*123G>A	/	10	3'UTR variant			HE
CLBL1	80	30 7896367 rs851405640 C T	c.-195C>T	/	1	5' UTR variant		Benign	HE
	1009	30 7929995 rs23648993 A G	c.735A>G	p.Leu245=	8	SNP synonimous	/	Pathogenic	HE
	1415	30 7931047 rs23645970 C A	c.*121C>A	/	10	3'UTR variant			HE
	1417	30 7931049 rs23645972 G A	c.*123G>A	/	10	3'UTR variant			HE
ATM
CELL LINE	cDNA position	location in CanFam6	CDS position	Protein position	Exon	Tipe of mutation	Consequences VEP	Consequences FidoSNP	Homozygous/Heterozygous
GL1	943	5 24201127 rs852655900 G A	c.504C>T	p.Phe168=	7	SNP synonimous	/	Benign	HO
	1489	5 24198175 rs850636710 C T	c.1050G>A	p.Ala350=	9	SNP synonimous	/	Pathogenic	HO
	3133	5 24186847 rs851913470 C T	c.2694G>A	p.Leu898=	19	SNP synonimous	/	Benign	HO
	3870	5 24176529 rs851694898 T A	c.3431A>T	p.His1144Leu	25	SNP missense	Tolerated (SIFT low confidence)	Benign	HO
	4450	5 24168573 rs852744517 G A	c.4011C>T	p.Phe1337=	28	SNP synonimous	/	Benign	HO
	4915	5 24159456 rs852899885 G A	c.4476C>T	p.Phe1492=	31	SNP synonimous	/	Benign	HO
	5107	5 24158633 rs24168717 T G	c.4668A>C	p.Leu1556=	32	SNP synonimous	/	Benign	HO
	5706	5 24152324 rs24154550 A G	c.5267T>C	p.Met1756Thr	36	SNP missense	Tolerated (SIFT low confidence)	Benign	HO
	6286	5 24145288 rs24212611 A G	c.5847T>C	p.Cys1949=	40	SNP synonimous	/	Benign	HO
	6547	5 24139690 rs852679263 G A	c.6108C>T	p.Tyr2036=	43	SNP synonimous	/	Benign	HO
	8584	5 24125189 rs24220999 G A	c.8145C>T	p.Leu2715=	56	SNP synonimous	/	Benign	HO
	8650	5 24124322 rs852642850 C T	c.8211G>A	p.Thr2737=	57	SNP synonimous	/	Benign	HO
	9967	5 24107795 rs3329340400 C T	c.*357G>A	/	64	SNP in 3' UTR	3 prime UTR variant	Benign	HO
CLBL1	216	5 24222101 rs3329557033 G C	c.-224C>G	/	2	SNP in 5' UTR	5'UTR variant	Benign	HE
	226-228	5 24222088 rs3329546106 CCTT C	c.-214_-212del	/	2	deletion in 5'UTR	5'UTR variant	/	HE
	1798	5 24195251 rs851974017 C T	c.1359G>A	p.Pro453=	11	SNP synonimous	/	Pathogenic	HE
	3133	5 24186847 rs851913470 C T	c.2694G>A	p.Leu898=	19	SNP synonimous	/	Benign	HE
	3870	5 24176529 rs851694898 T A	c.3431A>T	p.His1144Leu	25	SNP missense	Tolerated (SIFT low confidence)	Benign	HE
	4450	5 24168573 rs852744517 G A	c.4011C>T	p.Phe1337=	28	SNP synonimous	/	Benign	HE
	5107	5 24158633 rs24168717 T G	c.4668A>C	p.Leu1556=	32	SNP synonimous	/	Benign	HE
	5706	5 24152324 rs24154550 A G	c.5267T>C	p.Met1756Thr	36	SNP missense	Tolerated (SIFT low confidence)	Benign	HO
	6286	5 24145288 rs24212611 A G	c.5847T>C	p.Cys1949=	40	SNP synonimous	/	Benign	HE
	6536	5 24139701 rs850778760 G A	c.6097C>T	p.Leu2033=	43	SNP synonimous	/	Benign	HE
	8203	5 24128894 rs852908870 A C	c.7764T>G	p.Pro2588=	53	SNP synonimous	/	Benign	HE
	8221	5 24128876 rs851427322 A G	c.7782T>C	p.Leu2594=	53	SNP synonimous	/	Benign	HO
ATR
CELL LINE	cDNA position	location in CanFam6	CDS position	Protein position	Exon	Tipe of mutation	Consequences VEP	Consequences FidoSNP	Homozygous/Heterozygous
GL1	1613-1624	23 38138401 CTAAAATTATGGC C	c.1550_1561del	p.Cys517_Arg521delinsTrp	6_7	inframe deletion	/	/	HO
CLBL1	602	23 38142359 rs850615440 C T	c.539G>A	p.Arg180Gln	4	SNP missense	Tolerated (0.05)	Pathogenic	HO
	1613-1624	23 38138401 CTAAAATTATGGC C	c.1550_1561del	p.Cys517_Arg521delinsTrp	6_7	inframe deletion	/	/	HO
STK11
CELL LINE	cDNA position	location in CanFam6	CDS position	Protein position	Exon	Tipe of mutation	Consequences VEP	Consequences FidoSNP	Homozygous/Heterozygous
GL1	1392	20 57363456 rs851216653 C T	c.1200G>A	p.Ser400=	9	SNP synonimous	/	Benign	HE
CLBL1	1392	20 57363456 rs851216653 C T	c.1200G>A	p.Ser400=	9	SNP synonimous	/	Benign	HO
